# Supplementary material for: Methylation on CpG repeats modulates hydroxymethylcytosine induced duplex destabilization
Source: Royal Society of Chemistry journal article supplement (doi:10.1039/c6ra08647k), 2016-01-01
Supplement: c6ra08647k1.pdf [file c6ra08647k1.pdf]

## Supporting Information

# Methylation on CpG Repeats Modulates Hydroxymethylcytosine Induced Duplex Destabilization

Qiong Wu, Jiun Ru Wong, Penny Liu Qing Yeo, Dawei Zhang, and Fangwei Shao\*

Division of Chemistry and Biological Chemistry, Nanyang Technological University, 21 Nanyang Link, Singapore 637371, Singapore. fwshao@ntu.edu.sg, phone: +65-6592-2511.

## 1 General method and materials

Chemicals used were purchased either from Aldrich or Alfa Aesar. Water used for buffer was obtained from Milli-Q filtration system (18.2 M $\Omega$ .cm). Reagents for DNA and RNA syntheses, 5-mdC amidite were purchased from Glen Research. Standard CPG supports (1  $\mu$ mol) are purchased from BioAutomation. All chemicals used as received without further purification. Mermade 4 automated DNA synthesizer was used for the synthesis of all the DNA and RNA strands. Shimadzu reverse phase HPLC (LC-20AD) with column (Microsorb 100-5 C18 Dynamax, 250  $\times$  10.0 mm) was used to purify the DNA and RNA strands. CD spectrums were recorded on a Jasco J-810 CD Spectro-polarimeter. UV-Melting temperature of duplex was analyzed on Shimadzu UV-2550 UV-VIS spectrophotometer equipped with TMSPC-8 peltier controller.

For UV-melting analysis in buffer solution, A-form or B-form DNA duplexes (1.5  $\mu$ M in 20 mM sodium phosphate pH=7) were prepared by heating the samples from 15  $^{\circ}$ C to 90  $^{\circ}$ C at a rate of 0.5  $^{\circ}$ C/min, then cooling down to 15  $^{\circ}$ C at a rate of 0.5  $^{\circ}$ C/min. UV melting data was collected by heating annealed duplex sample from 15  $^{\circ}$ C to 90  $^{\circ}$ C at a rate of 0.5  $^{\circ}$ C/min with measurement interval of 1  $^{\circ}$ C. The  $T_m$  curves of three repeats were analyzed with sigmoidal fitting in OriginPro 8.5.1. Average value of three repeats was used as  $T_m$  of the duplex.

For UV-melting analysis in 16% Ficoll solution, A-form or B-form DNA duplexes in sodium phosphate buffer were prepared by heating the samples at 90  $^{\circ}$ C for 5 minutes then cooling down to room temperature over 3 hours. To the annealed DNA sample, Ficoll (48% as stock solution) was added and mixed thoroughly. The final concentration of DNA, sodium phosphate buffer and Ficoll were 1.5  $\mu$ M, 20 mM, and 16%, respectively. UV melting data was collected by heating annealed duplex sample from 15  $^{\circ}$ C to 90  $^{\circ}$ C at a rate of 0.5  $^{\circ}$ C/min with measurement interval of 1  $^{\circ}$ C. The  $T_m$  curves of three repeats were analyzed with sigmoidal fitting in OriginPro 8.5.1. Average value of three repeats was used as  $T_m$  of the duplex.

## 2 DNA and RNA sequences preparation and characterization

**CHC** and **MHM** were synthesized according to previous report.<sup>[1]</sup> The rest oligonucleotides were synthesized on a MerMade 4 DNA Synthesizer according to manufacturer's recommended procedures. Upon the completion of synthesis, DNA sequence was cleaved from the CpG support by treating with 28% NH<sub>4</sub>OH aqueous solution. The collected NH<sub>4</sub>OH solution was incubated at 60  $^{\circ}$ C for 15 hours to remove protecting group of nucleosides. DNA with DMT group was purified by reverse phase HPLC. The DMT group on DNA was later removed by incubating the sample with 80% acetic acid solution (200  $\mu$ L) at room temperature for 15 min. DNA without DMT group was collected by precipitation with ethanol (800  $\mu$ L) and purified by HPLC. RNA (*g*) was prepared as the recommended procedure provided by manufacturer. As shown in Table S1, all of the purified oligonucleotides were confirmed by ESI-mass spectroscopy (Sangon Ltd. Shanghai, China).



**Table S1.** Calculated Mass and ESI-Mass of DNA and RNA sequences

|      | DNA        | Sequence (5'-3')                                                | Calculated Mass <i>m/z</i> | ESI-Mass found <i>m/z</i> |
|------|------------|-----------------------------------------------------------------|----------------------------|---------------------------|
| ODN1 | <b>CCC</b> | TTC CAC GCG CGT TCC TGA CTG ACT C                               | 7544.9                     | 7544.3                    |
|      | <b>CHC</b> | TTC CAC G <b>hm</b> CG CGT TCC TGA CTG ACT C                    | 7574.9                     | 7577.8                    |
|      | <b>CMC</b> | TTC CAC G <b>m</b> CG CGT TCC TGA CTG ACT C                     | 7558.9                     | 7558.3                    |
| ODN2 | <b>MCM</b> | TTC C <b>Am</b> C GCG <b>m</b> CGT TCC TGA CTG ACT C            | 7573.0                     | 7572.2                    |
|      | <b>MHM</b> | TTC C <b>Am</b> C G <b>hm</b> CG <b>m</b> CGT TCC TGA CTG ACT C | 7603.0                     | 7608.2                    |
|      | <b>MMM</b> | TTC C <b>Am</b> C G <b>m</b> CG <b>m</b> CGT TCC TGA CTG ACT C  | 7587.0                     | 7587.4                    |
| ODN3 | <b>G</b>   | GAG TCA GTC AGG AAC GCG CGT GGA A                               | 7781.1                     | 7781.2                    |
| ODN4 | <b>A</b>   | GAG TCA GTC AGG AAC GCA CGT GGA A                               | 7765.1                     | 7765.5                    |
| ODN5 | <b>C</b>   | GAG TCA GTC AGG AAC GCC CGT GGA A                               | 7741.1                     | 7740.2                    |
| ODN6 | <b>T</b>   | GAG TCA GTC AGG AAC GCT CGT GGA A                               | 7756.1                     | 7755.4                    |
| RNA1 | <b>g</b>   | gag tca gtc agg aac gcg cgt gga a                               | 8139                       | 8140.5                    |

### 3 CD spectrums of A-form and B-form duplexes in buffer and crowding condition

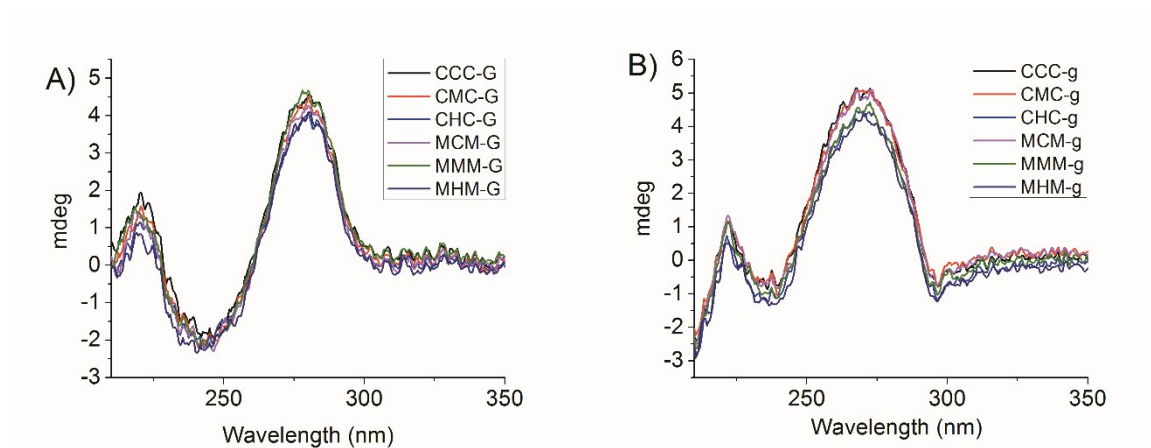

**Figure S1.** CD spectrums of A) **CXC/MXM-G** duplexes and B) **CXC/MXM-g** duplexes in sodium phosphate buffer (20 mM, pH=7), **X=C/M/H**.

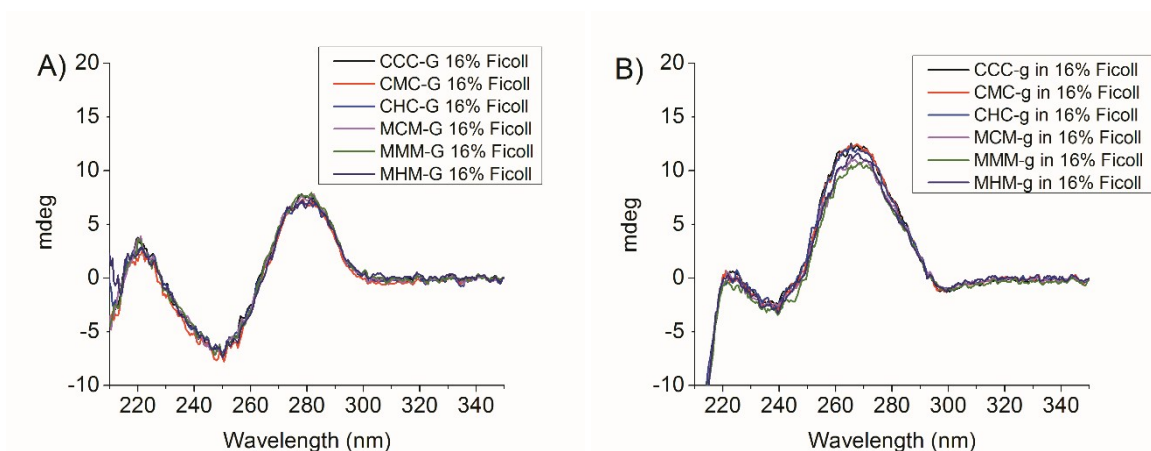

**Figure S2.** CD spectrums of A) **CXC/MXM-G** duplexes and B) **CXC/MXM-g** duplexes in sodium phosphate buffer (20 mM, pH=7) mixed with 16% of Ficoll, **X=C/M/H**.

#### 4 Validation of $T_m$ analysis method

**Table S2.** Three times individually repeats of  $T_m$  °C analysis for **CCC-G** in buffer condition

| $T_m$ | <b>CCC-G</b> |
|-------|--------------|
| 1     | 62.09        |
| 2     | 62.01        |
| 3     | 62.04        |

The UV melting of **CCC-G** in sodium phosphate buffer (20 mM, pH=7) was collected for three times. For each time,  $T_m$  was calculated as an average value from three simultaneous repeats, as show in Table S2. Sample was annealed by heating the sample from 15 °C to 90 °C in a rate of 0.5 °C/min, then cool down to 15 °C in a rate of 0.5 °C/min. UV melting data was collected by heating annealed duplex sample from 15 °C to 90 °C in a rate of 0.5 °C/min with measurement interval of 1 °C. The average value of three times individually repeats is 62.05 °C with standard deviation of 0.05 °C. Therefore, data acquired by using current method has good repeatability.

#### 5 Melting Temperatures of A-form and B-form duplexes in buffer and crowding condition

**Table S3.**  $T_m$  (°C) of A-form and B-form duplexes in buffer and crowding condition

|               |                 | <b>CCC</b> | <b>CMC</b> | <b>CHC</b> | <b>MCM</b> | <b>MMM</b> | <b>MHM</b> |
|---------------|-----------------|------------|------------|------------|------------|------------|------------|
| Buffer        | <b>G (ODN3)</b> | 62.05(5)   | 62.4(2)    | 61.0(1)    | 62.6(2)    | 63.0(2)    | 62.6(3)    |
|               | <b>g (RNA1)</b> | 62.63(5)   | 63.4(3)    | 62.0(1)    | 63.65(2)   | 64.6(4)    | 64.3(4)    |
| 16%<br>Ficoll | <b>G (ODN3)</b> | 65.3(1)    | 65.6(2)    | 64.66(7)   | 65.6(3)    | 66.1(2)    | 66.1(3)    |
|               | <b>g (RNA1)</b> | 66.02(3)   | 66.8(2)    | 65.00(6)   | 66.9(1)    | 67.7(2)    | 67.1(1)    |

\* Standard deviation on last digit is in parentheses.

#### 6 Melting Temperatures of mismatched duplexes in buffer condition

**Table S4.**  $T_m$  (°C) of mismatched duplexes in buffer condition

|                 | <b>CCC</b> | <b>CMC</b> | <b>CHC</b> | <b>MCM</b> | <b>MMM</b> | <b>MHM</b> |
|-----------------|------------|------------|------------|------------|------------|------------|
| <b>A (ODN4)</b> | 57.04(7)   | 57.6(2)    | 56.03(5)   | 57.37(6)   | 58.1(2)    | 57.6(3)    |
| <b>C (ODN5)</b> | 54.73(4)   | 55.2(2)    | 53.23(2)   | 55.4(3)    | 55.7(2)    | 54.9(3)    |
| <b>T (ODN6)</b> | 54.2(2)    | 54.4(3)    | 52.77(3)   | 54.47(8)   | 55.2(3)    | 54.2(2)    |

\* Standard deviation on last digit is in parentheses.

## 7 Optimization of C-G, hmC-G, mC-G base pairs and calculation of their hydrogen bonding energies

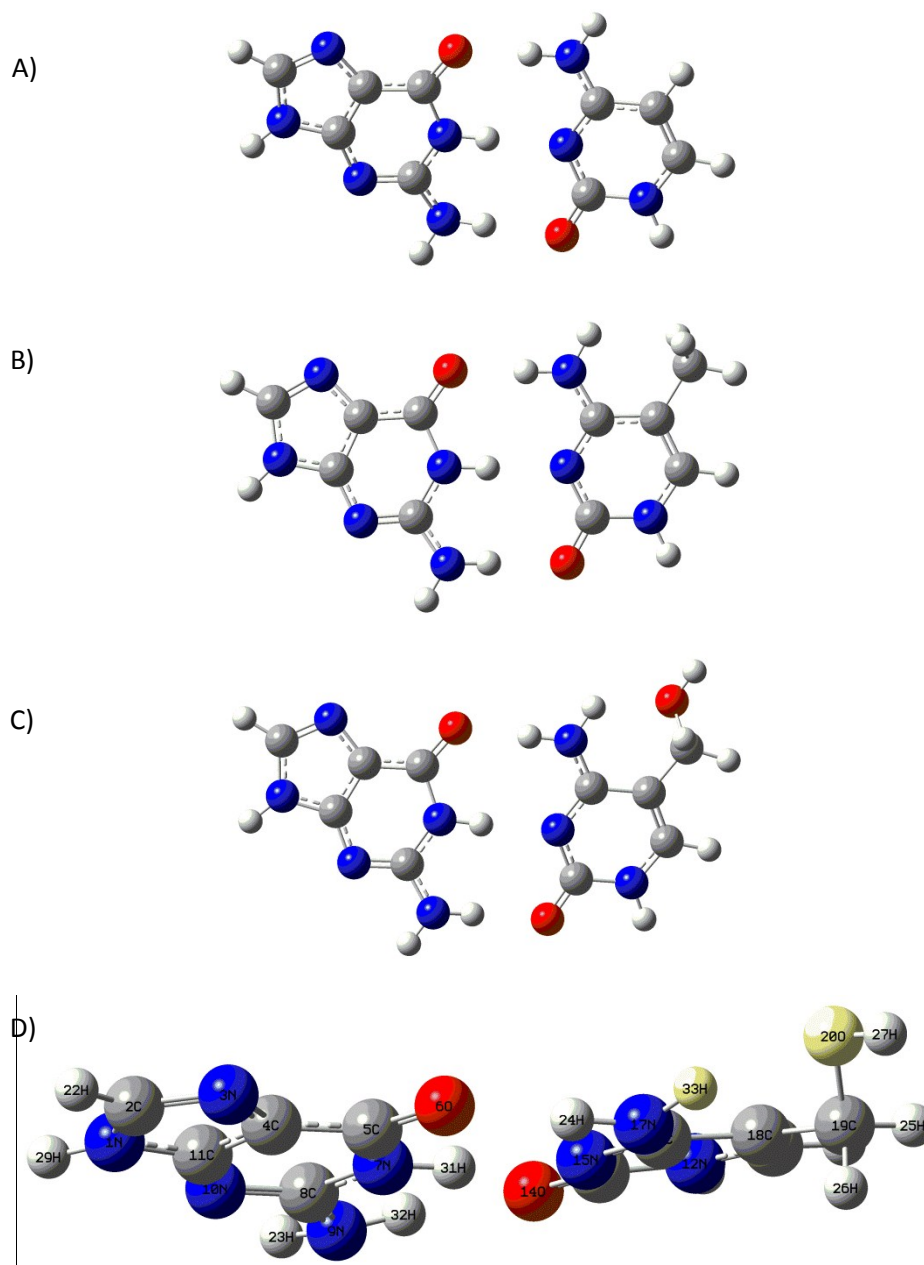

**Figure S3.** Optimized C-G, hmC-G, mC-G base pairs. The initial structures of C-G, mC-G, hmC-G base pairs were extracted from reported crystal structures. C-G and hmC-G were extracted from **PDB 4GLC**, mC-G was from **PDB 4GJU**.<sup>[2]</sup> The Simulation was performed on the platform of Gaussian 09 at MP2/6-31G(d) level. A) front view of C-G base pair; B) front view of mC-G base pair; C) front view of hmC-G base pair; D) side view of hmC-G base pair.

**Table S5.** Total energies of base pairs ( $E_{tot}$ ) and hydrogen bonding interaction energies ( $E_{int}$ ) of base pairs ( $E_{int} = E_{tot} - E_{Guanine} - E_{Cytosine}$ ). Energy calculations for base pairs and individual bases were performed at MP2/aug-cc-pvdz level with Gaussian 09.

|       | $E_{tot}$ hartree | $E_{Cytosine}$ hartree | $E_{Guanine}$ hartree | $E_{int}$ hartree | $E_{int}$ kcal mol <sup>-1</sup> |
|-------|-------------------|------------------------|-----------------------|-------------------|----------------------------------|
| C-G   | -935.1347879      | -393.910505            | -541.1764782          | -0.047805         | -29.9981                         |
| hmC-G | -1049.390317      | -508.167464            | -541.1764781          | -0.0463746        | -29.1005                         |
| mC-G  | -974.3285951      | -433.103321            | -541.1764782          | -0.0487961        | -30.62                           |

**Table S6.** Total energies of base pairs ( $E_{tot}$ ) and hydrogen bonding interaction energies ( $E_{int}$ ) of base pairs ( $E_{int} = E_{tot} - E_{Guanine} - E_{Cytosine}$ ). Structure optimizations and energy calculations for base pairs and bases were performed at M06-2X/6-31+G(d,p) level by using Gaussian 09.

|       | $E_{tot}$ hartree | $E_{Cytosine}$ hartree | $E_{Guanine}$ hartree | $E_{int}$ hartree | $E_{int}$ kcal mol <sup>-1</sup> |
|-------|-------------------|------------------------|-----------------------|-------------------|----------------------------------|
| C-G   | -937.2220926      | -394.79668             | -542.3790456          | -0.0455348        | -28.5735                         |
| hmC-G | -1051.713941      | -509.289872            | -542.3798775          | -0.0441912        | -27.7304                         |
| mC-G  | -976.5224447      | -434.096208            | -542.3798774          | -0.0463592        | -29.0908                         |

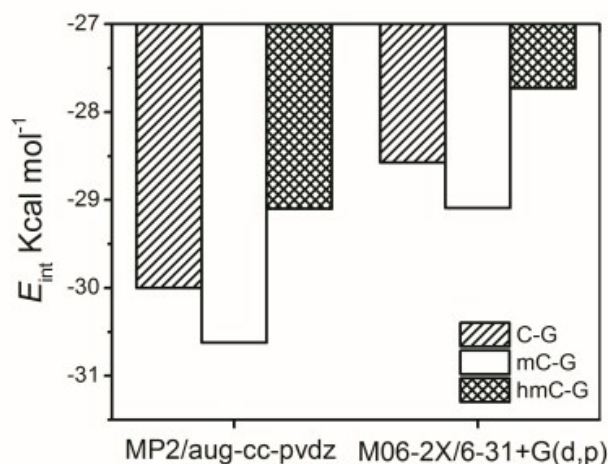

**Figure S4.** Similar trends of  $E_{int}$  for the three base pairs can be obtained by applying both MP2/aug-cc-pvdz method and M06-2X/6-31+G(d,p) method. MP2 (second-order Moeller-Plesset) theory, is considered as a standard method for introducing dispersion energy in theoretical studies. The aug-cc-pVDZ basis set has been proved to gives a reliable estimate of the interaction energy between mC-G base pair.<sup>[3]</sup> Beside MP2 method, density functional theory (DFT) is another widely used method in the computational chemistry community. M06-2X, designed by Truhlar and co-workers, predicts accurate valence and is an excellent functional for the study of noncovalent interactions.<sup>[4]</sup> These calculation



results showed consistent trend that hmC-G base pair maintained the weakest H-bonding interaction comparing to C-G and mC-G base pairs.

## 8 Cartesian Coordinates for All Species

**Table S7.** C-G base pair optimized coordinates, at MP2/6-31G(d) level

| Tag | Symbol | X         | Y         | Z         |
|-----|--------|-----------|-----------|-----------|
| 1   | N      | -4.673683 | 0.483845  | -0.101785 |
| 2   | C      | -4.974102 | -0.857475 | -0.171017 |
| 3   | N      | -3.901302 | -1.630353 | -0.134514 |
| 4   | C      | -2.85624  | -0.733571 | -0.03412  |
| 5   | C      | -1.443658 | -0.96399  | 0.033671  |
| 6   | O      | -0.834826 | -2.048172 | 0.019309  |
| 7   | N      | -0.746251 | 0.250592  | 0.128104  |
| 8   | C      | -1.301951 | 1.509452  | 0.147919  |
| 9   | N      | -0.433629 | 2.54367   | 0.321055  |
| 10  | N      | -2.601392 | 1.741314  | 0.075916  |
| 11  | C      | -3.308474 | 0.586495  | -0.01156  |
| 12  | N      | 4.335494  | 0.916886  | -0.169074 |
| 13  | C      | 2.940704  | 1.068886  | -0.118965 |
| 14  | O      | 2.466446  | 2.211341  | -0.198339 |
| 15  | N      | 2.198003  | -0.069737 | 0.013744  |
| 16  | C      | 2.787131  | -1.268221 | 0.073986  |
| 17  | N      | 1.994958  | -2.339908 | 0.193554  |
| 18  | C      | 4.217446  | -1.4256   | 0.027081  |
| 19  | C      | 4.955623  | -0.293231 | -0.096989 |
| 20  | H      | -5.99455  | -1.210747 | -0.247387 |
| 21  | H      | 0.55672   | 2.422856  | 0.095308  |
| 22  | H      | 2.389408  | -3.269507 | 0.194106  |
| 23  | H      | 4.68804   | -2.399852 | 0.08424   |
| 24  | H      | 6.040023  | -0.28875  | -0.144917 |
| 25  | H      | -5.31837  | 1.265245  | -0.106399 |
| 26  | H      | 4.862381  | 1.7783    | -0.265129 |
| 27  | H      | 0.285584  | 0.166204  | 0.141575  |
| 28  | H      | -0.834902 | 3.453666  | 0.137455  |
| 29  | H      | 0.968455  | -2.233403 | 0.154359  |

**Table S8.** mC-G base pair optimized coordinates, at MP2/6-31G(d) level

| <b>Tag</b> | <b>Symbol</b> | <b>X</b>  | <b>Y</b>  | <b>Z</b>  |
|------------|---------------|-----------|-----------|-----------|
| 1          | N             | -3.934564 | 1.461901  | -0.162253 |
| 2          | C             | -2.535527 | 1.483119  | -0.131378 |
| 3          | N             | -1.907164 | 0.275688  | -0.020597 |
| 4          | C             | -2.608281 | -0.860353 | 0.039815  |
| 5          | C             | -4.054497 | -0.896442 | 0.016962  |
| 6          | C             | -4.815679 | -2.185816 | 0.099424  |
| 7          | C             | -4.666546 | 0.314136  | -0.088428 |
| 8          | O             | -1.952012 | 2.575472  | -0.206868 |
| 9          | N             | -1.914562 | -2.002109 | 0.139656  |
| 10         | N             | 4.988208  | 0.18367   | -0.070215 |
| 11         | C             | 5.163258  | -1.179184 | -0.148909 |
| 12         | N             | 4.022784  | -1.848966 | -0.132195 |
| 13         | C             | 3.064613  | -0.859445 | -0.035364 |
| 14         | C             | 1.635987  | -0.957587 | 0.012705  |
| 15         | O             | 0.929411  | -1.980548 | -0.019528 |
| 16         | N             | 1.053166  | 0.315409  | 0.110415  |
| 17         | C             | 1.723407  | 1.516841  | 0.150238  |
| 18         | N             | 0.953526  | 2.625466  | 0.323916  |
| 19         | N             | 3.039904  | 1.627145  | 0.095645  |
| 20         | C             | 3.637414  | 0.41245   | 0.004797  |
| 21         | H             | -5.892218 | -1.997477 | 0.077026  |
| 22         | H             | -4.590867 | -2.723996 | 1.02691   |
| 23         | H             | -4.577354 | -2.847545 | -0.741021 |
| 24         | H             | -5.747003 | 0.426793  | -0.118898 |
| 25         | H             | -0.883298 | -1.98514  | 0.082117  |
| 26         | H             | 6.147261  | -1.625381 | -0.216775 |
| 27         | H             | 1.43958   | 3.496226  | 0.155924  |
| 28         | H             | -4.381741 | 2.368905  | -0.242346 |
| 29         | H             | 5.702781  | 0.901624  | -0.060385 |
| 30         | H             | 0.017519  | 0.327626  | 0.112559  |
| 31         | H             | -2.385093 | -2.894656 | 0.134973  |
| 32         | H             | -0.042747 | 2.599886  | 0.091315  |

**Table S9.** hmC-G base pair optimized coordinates, at MP2/6-31G(d) level

| <b>Tag</b> | <b>Symbol</b> | <b>X</b>  | <b>Y</b>  | <b>Z</b>  |
|------------|---------------|-----------|-----------|-----------|
| 1          | N             | 5.2316    | -0.102191 | -0.132887 |
| 2          | C             | 5.286262  | -1.476155 | -0.188522 |
| 3          | N             | 4.092981  | -2.043948 | -0.129484 |
| 4          | C             | 3.2266    | -0.973607 | -0.028687 |
| 5          | C             | 1.795919  | -0.947102 | 0.05938   |
| 6          | O             | 1.002092  | -1.903026 | 0.067636  |
| 7          | N             | 1.32942   | 0.374936  | 0.145848  |
| 8          | C             | 2.101732  | 1.513345  | 0.14305   |
| 9          | N             | 1.435005  | 2.689091  | 0.314363  |
| 10         | N             | 3.420493  | 1.508172  | 0.05278   |
| 11         | C             | 3.907986  | 0.244137  | -0.028343 |
| 12         | N             | -3.54061  | 1.925654  | -0.266382 |
| 13         | C             | -2.145827 | 1.836302  | -0.136556 |
| 14         | O             | -1.473955 | 2.873126  | -0.237651 |
| 15         | N             | -1.625404 | 0.591793  | 0.076322  |
| 16         | C             | -2.418774 | -0.480045 | 0.154569  |
| 17         | N             | -1.852314 | -1.680302 | 0.335248  |
| 18         | C             | -3.863296 | -0.383429 | 0.103818  |
| 19         | C             | -4.737796 | -1.56066  | 0.385459  |
| 20         | O             | -4.430787 | -2.594352 | -0.563113 |
| 21         | C             | -4.371018 | 0.856523  | -0.129503 |
| 22         | H             | 6.225879  | -2.007261 | -0.272281 |
| 23         | H             | 1.991345  | 3.508397  | 0.108471  |
| 24         | H             | -0.82572  | -1.755927 | 0.265829  |
| 25         | H             | -5.792159 | -1.258994 | 0.314918  |
| 26         | H             | -4.555262 | -1.919144 | 1.409316  |
| 27         | H             | -4.94116  | -3.384925 | -0.312542 |
| 28         | H             | -5.437146 | 1.054931  | -0.202247 |
| 29         | H             | 6.005349  | 0.551218  | -0.155742 |
| 30         | H             | -3.901494 | 2.857936  | -0.43905  |
| 31         | H             | 0.299489  | 0.476564  | 0.175824  |
| 32         | H             | 0.438969  | 2.744576  | 0.087841  |
| 33         | H             | -2.415814 | -2.49165  | 0.10605   |

**Table S10.** C-G base pair optimized coordinates, at M06-2X/6-31+G(d,p) level

| <b>Tag</b> | <b>Symbol</b> | <b>X</b>  | <b>Y</b>  | <b>Z</b>  |
|------------|---------------|-----------|-----------|-----------|
| 1          | N             | 4.664283  | 0.456713  | -0.000147 |
| 2          | C             | 4.950682  | -0.895978 | -0.00051  |
| 3          | N             | 3.882153  | -1.639117 | -0.000548 |
| 4          | C             | 2.836527  | -0.738639 | -0.000188 |
| 5          | C             | 1.420157  | -0.940959 | -0.00006  |
| 6          | O             | 0.790377  | -2.001579 | -0.000227 |
| 7          | N             | 0.730754  | 0.278431  | 0.000301  |
| 8          | C             | 1.302618  | 1.525823  | 0.000599  |
| 9          | N             | 0.454685  | 2.57213   | 0.001304  |
| 10         | N             | 2.605716  | 1.728778  | 0.000453  |
| 11         | C             | 3.303372  | 0.573288  | 0.000074  |
| 12         | N             | -4.317906 | 0.92393   | -0.000516 |
| 13         | C             | -2.922234 | 1.057691  | -0.000641 |
| 14         | O             | -2.443881 | 2.191313  | -0.001134 |
| 15         | N             | -2.184192 | -0.080398 | -0.000236 |
| 16         | C             | -2.770009 | -1.27758  | 0.000289  |
| 17         | N             | -1.985054 | -2.353355 | 0.000669  |
| 18         | C             | -4.207458 | -1.424505 | 0.000448  |
| 19         | C             | -4.936393 | -0.285803 | 0.000024  |
| 20         | H             | 5.968977  | -1.258397 | -0.000753 |
| 21         | H             | -0.559477 | 2.461923  | 0.000129  |
| 22         | H             | -2.386914 | -3.27624  | 0.00097   |
| 23         | H             | -4.677847 | -2.398336 | 0.000902  |
| 24         | H             | -6.020518 | -0.276333 | 0.000068  |
| 25         | H             | 5.316706  | 1.225772  | 0.000074  |
| 26         | H             | -4.839647 | 1.789513  | -0.000925 |
| 27         | H             | -0.29881  | 0.198231  | 0.000273  |
| 28         | H             | 0.86612   | 3.490341  | 0.000597  |
| 29         | H             | -0.957208 | -2.24415  | 0.000384  |

**Table S11.** mC-G base pair optimized coordinates, at M06-2X/6-31+G(d,p) level

| <b>Tag</b> | <b>Symbol</b> | <b>X</b>  | <b>Y</b>  | <b>Z</b>  |
|------------|---------------|-----------|-----------|-----------|
| 1          | N             | -3.906673 | 1.474378  | -0.005939 |
| 2          | C             | -2.509469 | 1.470742  | -0.00179  |
| 3          | N             | -1.89291  | 0.263091  | 0.003394  |
| 4          | C             | -2.596817 | -0.867679 | 0.003533  |
| 5          | C             | -4.049751 | -0.887239 | -0.0005   |
| 6          | C             | -4.814156 | -2.178374 | 0.000309  |
| 7          | C             | -4.643852 | 0.329116  | -0.005132 |
| 8          | O             | -1.915082 | 2.549916  | -0.002818 |
| 9          | N             | -1.919339 | -2.015431 | 0.008017  |
| 10         | N             | 4.974064  | 0.13784   | -0.001621 |
| 11         | C             | 5.123582  | -1.237088 | -0.003945 |
| 12         | N             | 3.985901  | -1.869291 | -0.003999 |
| 13         | C             | 3.035892  | -0.868338 | -0.001704 |
| 14         | C             | 1.606029  | -0.92792  | -0.000707 |
| 15         | O             | 0.875519  | -1.921751 | -0.001633 |
| 16         | N             | 1.041543  | 0.353854  | 0.001661  |
| 17         | C             | 1.736096  | 1.537776  | 0.003305  |
| 18         | N             | 0.996997  | 2.663391  | 0.007197  |
| 19         | N             | 3.053117  | 1.60905   | 0.002307  |
| 20         | C             | 3.631724  | 0.389893  | -0.000134 |
| 21         | H             | -5.889721 | -1.988629 | -0.00231  |
| 22         | H             | -4.585976 | -2.77852  | 0.888499  |
| 23         | H             | -4.582264 | -2.781943 | -0.884609 |
| 24         | H             | -5.722421 | 0.45052   | -0.0085   |
| 25         | H             | -0.885803 | -2.001199 | 0.008031  |
| 26         | H             | 6.100628  | -1.699604 | -0.005439 |
| 27         | H             | 1.497963  | 3.536013  | 0.003528  |
| 28         | H             | -4.343293 | 2.385782  | -0.009444 |
| 29         | H             | 5.699636  | 0.838372  | -0.001134 |
| 30         | H             | 0.008643  | 0.375457  | 0.002846  |
| 31         | H             | -2.40186  | -2.898412 | 0.006751  |
| 32         | H             | -0.023588 | 2.653337  | 0.000861  |

**Table S12.** hmC-G base pair optimized coordinates, at M06-2X/6-31+G(d,p) level

| Tag | Symbol | X         | Y         | Z         |
|-----|--------|-----------|-----------|-----------|
| 1   | N      | -5.221939 | -0.12509  | 0.086878  |
| 2   | C      | -5.266053 | -1.506133 | 0.034359  |
| 3   | N      | -4.084086 | -2.047394 | -0.032109 |
| 4   | C      | -3.213893 | -0.976449 | -0.023953 |
| 5   | C      | -1.784151 | -0.924823 | -0.077634 |
| 6   | O      | -0.978631 | -1.855222 | -0.14656  |
| 7   | N      | -1.320984 | 0.397895  | -0.042878 |
| 8   | C      | -2.103598 | 1.52281   | 0.02887   |
| 9   | N      | -1.454712 | 2.702944  | 0.042759  |
| 10  | N      | -3.42102  | 1.490962  | 0.079089  |
| 11  | C      | -3.903554 | 0.230603  | 0.049637  |
| 12  | N      | 3.529661  | 1.93951   | 0.077871  |
| 13  | C      | 2.135293  | 1.825498  | -0.006002 |
| 14  | O      | 1.46109   | 2.854855  | 0.025126  |
| 15  | N      | 1.617802  | 0.576736  | -0.102004 |
| 16  | C      | 2.407566  | -0.497161 | -0.127249 |
| 17  | N      | 1.835626  | -1.696489 | -0.18811  |
| 18  | C      | 3.858043  | -0.388908 | -0.117345 |
| 19  | C      | 4.737036  | -1.584141 | -0.314721 |
| 20  | O      | 4.444104  | -2.54998  | 0.689738  |
| 21  | C      | 4.355893  | 0.863445  | 0.006426  |
| 22  | H      | -6.203865 | -2.043364 | 0.050091  |
| 23  | H      | -2.021224 | 3.531392  | 0.115131  |
| 24  | H      | 0.806305  | -1.760033 | -0.162794 |
| 25  | H      | 5.787592  | -1.270185 | -0.266185 |
| 26  | H      | 4.554211  | -2.015127 | -1.31033  |
| 27  | H      | 4.989212  | -3.332678 | 0.551064  |
| 28  | H      | 5.421682  | 1.067557  | 0.039237  |
| 29  | H      | -5.998519 | 0.51598   | 0.142097  |
| 30  | H      | 3.888217  | 2.880403  | 0.164335  |
| 31  | H      | -0.294558 | 0.503558  | -0.076412 |
| 32  | H      | -0.437023 | 2.775101  | 0.030564  |
| 33  | H      | 2.397535  | -2.511792 | 0.011977  |

## 9 References

- [1] S. Xuan, Q. Wu, L. Cui, D. Zhang, F. Shao, *Bioorg. Med. Chem. Lett.*, **2015**, 25, 1186-1191.
- [2] D. Renciuik, O. Blacque, M. Vorlickova, B. Spingler, *Nucleic Acids Res.*, **2013**, 41, 9891-9900.
- [3] Q. Song, Z. Qiu, H. Wang, Y. Xia, J. Shen, Y. Zhang, *Struct. Chem.*, **2013**, 24, 55-65.
- [4] Y. Zhao, D. G. Truhlar, *Acc. Chem. Res.*, **2008**, 41, 157-167.
